# Supplementary material for: Ischemic heart disease among subjects with and without chronic obstructive pulmonary disease – ECG-findings in a population-based cohort study
Source: Springer Nature journal article supplement (doi:10.1186/s12890-015-0149-1), 2015-12-01
Supplement: MOESM1 [file 9752002]

**Additional file 1.** Basic characteristics, reported respiratory symptoms and comorbidities of all subjects (n=1625), comparing non-COPD and COPD (significant values in bold).

| Categories                 | Variables                         | Non-COPD<br>n=991 | COPD<br>n= 634 | P                |
|----------------------------|-----------------------------------|-------------------|----------------|------------------|
| Sex                        | Women, n (%)                      | 470 (47.4)        | 270 (42.6)     | 0.06             |
| Age                        | Years, mean (SD)                  | 65.4 (11.2)       | 67.1 (10.6)    | <b>&lt;0.01</b>  |
| Body constitution          | Body mass index, mean (SD)        | 27.4 (4.3)        | 26.4 (4.1)     | <b>&lt;0.001</b> |
|                            | Underweight <20, n (%)            | 16 (1.6)          | 24 (3.8)       |                  |
|                            | Normal 20-24.9, n (%)             | 294 (29.7)        | 220 (34.7)     |                  |
|                            | Overweight 25–29.9, n (%)         | 450 (45.5)        | 285 (45.0)     |                  |
|                            | Obese ≥30, n (%)                  | 230 (23.2)        | 105 (16.6)     |                  |
| Smoking habits             | Pack years, mean (SD)             | 7.2 (11.2)        | 16.1 (16.1)    | <b>&lt;0.001</b> |
|                            | Current smoker, n (%)             | 123 (12.4)        | 212 (33.5)     |                  |
|                            | Ex smoker, n (%)                  | 399 (40.3)        | 261 (41.2)     |                  |
|                            | Never smoker, n (%)               | 469 (47.3)        | 160 (25.3)     |                  |
| Comorbidities <sup>1</sup> | Diabetes, n (%)                   | 108 (10.9)        | 58 (9.1)       | 0.26             |
|                            | Arterial hypertension, n (%)      | 352 (35.5)        | 224 (35.3)     | 0.94             |
|                            | Angina pectoris, n (%)            | 122 (12.3)        | 80 (12.6)      | 0.86             |
|                            | Myocardial infarction, n (%)      | 34 (3.4)          | 36 (5.7)       | <b>0.03</b>      |
|                            | CABG, n (%)                       | 39 (3.9)          | 12 (1.9)       | <b>0.02</b>      |
|                            | PCI, n (%)                        | 18 (1.8)          | 11 (1.7)       | 0.90             |
|                            | Arrhythmias, n (%)                | 86 (8.7)          | 55 (8.7)       | 0.99             |
|                            | Reported IHD <sup>2</sup> , n (%) | 146 (14.7)        | 108 (17.0)     | 0.21             |

<sup>1</sup>Based on interview data. <sup>2</sup>Reported IHD includes any of angina pectoris, myocardial infarction, CABG and PCI.
