# Supplementary material for: Ischemic heart disease among subjects with and without chronic obstructive pulmonary disease – ECG-findings in a population-based cohort study
Source: Springer Nature journal article supplement (doi:10.1186/s12890-015-0149-1), 2015-12-01
Supplement: MOESM2 [file 9752002]

**Additional file 2.** Ischemic ECG changes in all subjects (n=1625), comparing non-COPD and COPD

|                      |                           |                               | Non-COPD<br>n=991 | COPD<br>n= 634 | P    |
|----------------------|---------------------------|-------------------------------|-------------------|----------------|------|
| Ischemic ECG changes | Q-Waves                   | Any, n (%)                    | 78 (7.9)          | 54 (8.5)       | 0.72 |
|                      |                           | Major Q/QS, n (%)             | 33 (3.5)          | 26 (4.3)       | 0.42 |
|                      |                           | Minor Q/QS, n (%)             | 45 (4.7)          | 28 (4.6)       | 0.93 |
|                      | ST-segment depressions    | Any, n (%)                    | 69 (7.0)          | 36 (5.7)       | 0.30 |
|                      |                           | Major, n (%)                  | 6 (0.6)           | 4 (0.7)        | 0.97 |
|                      |                           | Intermediate, n (%)           | 34 (3.6)          | 21 (3.4)       | 0.86 |
|                      |                           | Minor, n (%)                  | 21 (3.1)          | 11 (1.8)       | 0.13 |
|                      | T- wave items             | Any, n (%)                    | 173 (17.5)        | 110 (17.4)     | 0.96 |
|                      |                           | Major, n (%)                  | 3 (0.4)           | 1 (0.2)        | 1.00 |
|                      |                           | Intermediate, n (%)           | 74 (8.3)          | 49 (8.6)       | 0.85 |
|                      |                           | Minor, n (%)                  | 96 (10.5)         | 60 (10.3)      | 0.90 |
| Bundle branch block  | LBBB <sup>1</sup> , n (%) | 18 (2.1)                      | 15 (2.8)          | 0.41           |      |
| Whitehall criteria   | Ischemic heart disease    | Any, n (%)                    | 240 (24.2)        | 158 (24.9)     | 0.75 |
|                      |                           | Probable <sup>2</sup> , n (%) | 48 (6.0)          | 40 (7.8)       | 0.22 |
|                      |                           | Possible <sup>3</sup> , n (%) | 192 (20.4)        | 118 (19.9)     | 0.81 |

<sup>1</sup>Left bundle branch block. <sup>2</sup>Including Major Q/QS and LBBB. <sup>3</sup>Including Minor Q/QS, any ST-segment depression and any T-wave item
